# Supplementary material
Source: PubMed Central journal article supplement (PMC2727381)
Supplement: msn111_1.pdf [file msn111_1.pdf]

**Supplemental Table S1.**

| Gene                 | Loc   | M/F   | Sites | Syn | Non | n  | Ds | Ps | Dn  | Pn | P      | TDs   | TDn   |
|----------------------|-------|-------|-------|-----|-----|----|----|----|-----|----|--------|-------|-------|
| <b>Male-Biased</b>   |       |       |       |     |     |    |    |    |     |    |        |       |       |
| CG11379              | 1E3   | 3.04  | 603   | 155 | 448 | 12 | 17 | 7  | 5   | 4  | 0.4130 | -1.07 | -1.39 |
| CG2574               | 11A9  | 7.34  | 846   | 166 | 542 | 9  | 16 | 14 | 15  | 7  | 0.2783 | 0.95  | 0.64  |
| CG1314               | 19E4  | 8.95  | 1056  | 238 | 817 | 10 | 33 | 12 | 80  | 4  | 0.0004 | -1.30 | -0.82 |
| CG9156               | 13B9  | 6.65  | 906   | 212 | 694 | 9  | 37 | 15 | 1   | 0  | 1.0000 | 0.01  | na    |
| CG12681              | 4D3   | 12.14 | 1104  | 244 | 860 | 11 | 47 | 5  | 120 | 3  | 0.0490 | 0.98  | 0.60  |
| CG12395              | 14A6  | 7.11  | 765   | 159 | 603 | 12 | 18 | 4  | 20  | 0  | 0.1100 | 1.27  | na    |
| CG2577               | 11A9  | 8.26  | 1035  | 241 | 791 | 11 | 32 | 26 | 4   | 0  | 0.1320 | -0.98 | na    |
| CG1950               | 11A2  | 6.68  | 1023  | 228 | 792 | 10 | 33 | 20 | 64  | 15 | 0.0175 | 0.12  | -0.80 |
| CG1503               | 19F1  | 6.16  | 1007  | 224 | 697 | 12 | 20 | 12 | 24  | 6  | 0.1260 | 0.03  | -1.43 |
| CG6789               | 4F1   | 7.40  | 972   | 227 | 742 | 12 | 33 | 20 | 47  | 17 | 0.2000 | 0.62  | 0.07  |
| CG11697              | 10C7  | 4.81  | 669   | 155 | 511 | 12 | 28 | 1  | 17  | 5  | 0.0730 | -1.13 | -0.32 |
| CG5662               | 13B3  | 4.06  | 861   | 198 | 663 | 12 | 15 | 23 | 20  | 8  | 0.0133 | -0.01 | 0.23  |
| CG6999               | 8C8   | 3.49  | 665   | 126 | 471 | 12 | 26 | 3  | 81  | 6  | 0.5600 | -1.18 | -1.11 |
| CG5334               | 12F4  | 3.93  | 450   | 99  | 351 | 11 | 21 | 5  | 63  | 3  | 0.0340 | 0.25  | -1.61 |
| CG18341              | 5C2   | 4.66  | 1081  | 233 | 688 | 11 | 26 | 22 | 18  | 2  | 0.0026 | -0.08 | -1.42 |
| CG10920              | 7C1   | 4.91  | 1197  | 297 | 894 | 12 | 43 | 24 | 56  | 11 | 0.0099 | -0.06 | -0.27 |
| CG7860               | 13D3  | 3.11  | 996   | 258 | 738 | 12 | 19 | 22 | 10  | 5  | 0.1741 | -0.64 | -0.99 |
| <b>Female-biased</b> |       |       |       |     |     |    |    |    |     |    |        |       |       |
| CG14434              | 6D7   | 0.24  | 564   | 136 | 425 | 12 | 7  | 4  | 6   | 2  | 0.6000 | 1.07  | -0.24 |
| CG15717              | 11E1  | 0.28  | 919   | 185 | 571 | 12 | 12 | 7  | 16  | 8  | 0.8107 | -0.90 | 0.12  |
| CG9125               | 15A9  | 0.31  | 1218  | 257 | 868 | 12 | 34 | 11 | 62  | 5  | 0.0125 | -0.70 | 0.52  |
| CG3024               | 4C11  | 0.35  | 1098  | 236 | 784 | 10 | 35 | 5  | 51  | 6  | 0.7637 | -0.68 | -0.58 |
| CG8326               | 16B9  | 0.34  | 1068  | 228 | 768 | 12 | 18 | 13 | 9   | 5  | 0.6922 | -0.20 | 0.14  |
| CG3704               | 1D2   | 0.33  | 1267  | 264 | 879 | 8  | 29 | 11 | 14  | 1  | 0.0690 | -0.29 | -1.09 |
| CG12117              | 7E11  | 0.38  | 786   | 193 | 590 | 11 | 20 | 12 | 5   | 2  | 1.0000 | 0.43  | 0.85  |
| CG3004               | 8F1   | 0.37  | 998   | 218 | 721 | 10 | 23 | 18 | 7   | 0  | 0.0360 | -0.43 | na    |
| CG4593               | 6E4   | 0.37  | 630   | 137 | 490 | 12 | 12 | 19 | 3   | 0  | 0.0760 | 0.48  | na    |
| CG8675               | 15F4  | 0.42  | 705   | 146 | 556 | 12 | 13 | 5  | 2   | 1  | 0.8500 | -1.29 | -1.16 |
| CG2222               | 9B14  | 0.40  | 759   | 152 | 484 | 10 | 10 | 11 | 2   | 4  | 0.5310 | -0.31 | -1.79 |
| CG9915               | 14B9  | 0.43  | 1261  | 233 | 832 | 12 | 17 | 8  | 4   | 1  | 0.5800 | 0.02  | -1.15 |
| CG1749               | 10B15 | 0.42  | 1307  | 290 | 922 | 10 | 26 | 5  | 4   | 9  | 0.0007 | -0.94 | -0.62 |
| <b>Unbiased</b>      |       |       |       |     |     |    |    |    |     |    |        |       |       |
| CG14629              | 1E1   | 1.09  | 756   | 180 | 576 | 8  | 16 | 2  | 6   | 3  | 0.1700 | -1.31 | 0.33  |
| CG1751               | 10B15 | 1.03  | 727   | 139 | 458 | 12 | 10 | 1  | 1   | 2  | 0.0450 | -1.14 | -1.45 |
| CG15247              | 9A3   | 1.01  | 1130  | 261 | 801 | 10 | 11 | 22 | 3   | 13 | 0.2780 | 0.44  | -0.44 |
| CG9919               | 14B13 | 1.02  | 1070  | 223 | 728 | 11 | 29 | 17 | 2   | 2  | 0.6110 | -0.38 | -1.43 |
| CG2555               | 11B1  | 1.00  | 854   | 159 | 432 | 10 | 9  | 15 | 4   | 4  | 0.5400 | -0.75 | 0.50  |
| CG1397               | 10A8  | 0.97  | 702   | 108 | 345 | 12 | 7  | 2  | 8   | 4  | 0.5700 | -0.39 | 0.47  |
| CG9571               | 19B1  | 0.95  | 765   | 170 | 592 | 12 | 14 | 10 | 8   | 10 | 0.3700 | -0.14 | -1.29 |
| CG14797              | 2B7   | 1.05  | 787   | 165 | 498 | 12 | 9  | 8  | 7   | 4  | 0.5800 | 0.25  | -0.25 |
| CG3603               | 3C3   | 0.98  | 818   | 195 | 552 | 8  | 28 | 18 | 1   | 1  | 0.7600 | -0.12 | -1.07 |
| CG14772              | 2A2   | 0.99  | 640   | 126 | 369 | 12 | 10 | 2  | 3   | 5  | 0.0330 | -1.46 | -1.12 |
| CG11126              | 10A4  | 1.01  | 713   | 140 | 451 | 9  | 10 | 12 | 8   | 11 | 0.8300 | -0.36 | -0.70 |
| CG15313              | 9A5   | 0.99  | 614   | 141 | 417 | 12 | 14 | 10 | 6   | 11 | 0.1440 | -0.39 | -1.55 |
| CG9723               | 14F5  | 0.95  | 1251  | 299 | 883 | 11 | 36 | 18 | 61  | 5  | 0.0003 | -0.46 | -1.01 |
| CG9164               | 13C1  | 1.02  | 1245  | 210 | 678 | 9  | 14 | 28 | 1   | 8  | 0.1530 | -0.38 | -1.80 |
| CG15336              | 7D16  | 1.08  | 480   | 111 | 366 | 12 | 10 | 17 | 10  | 13 | 0.6400 | -1.47 | -0.68 |

**Table S1 column descriptions:**

1. Gene = CG number (D. melanogaster genome release 4)
2. Loc = Cytological location
3. M/F = Average male/female expression ratio
4. Sites = Total number of sites sequenced, including introns
5. Syn = Number of synonymous sites
6. Non = Number of nonsynonymous sites
7. n = Sample size (number of D. melanogaster alleles sequenced)
8. Ds = number of synonymous fixed differences between species
9. Ps = number of synonymous polymorphisms within D. melanogaster
10. Dn = number of nonsynonymous fixed differences between species
11. Pn = number of nonsynonymous polymorphisms within D. melanogaster
12. P = P-value from MK test. Red numbers indicate significant tests in the direction of positive selection. Blue numbers indicate significant tests in the direction of weak purifying selection.
13. TDs = Tajima's D for synonymous sites
14. TDn = Tajima's D for nonsynonymous sites
