# Supplementary material
Source: PubMed Central journal article supplement (PMC2727381)
Supplement: msn111_2.pdf [file msn111_2.pdf]

| <b>Supplemental Table S2.</b> |             |                           |                          |                     |
|-------------------------------|-------------|---------------------------|--------------------------|---------------------|
| <b>Gene</b>                   | <b>Type</b> | <b>Forward Primer</b>     | <b>Reverse Primer</b>    | <b>Anneal. Temp</b> |
| <b>MALE-BIASED GENES</b>      |             |                           |                          |                     |
| CG11379                       | PCR         | CTGACCCGAATTTACTCCCG      | AGCTATTGACTGAGGTAGTG     | 53                  |
| CG2574                        | PCR         | CCTGTGCGTTGGCTGAAAAC      | CAAAAACCCCATAAAAGCGAAG   | 54                  |
| CG1314                        | PCR         | TGTTCTAACCTTCTGTCATCAG    | CGTCCAAGTACAAAGTGATCC    | 53                  |
| CG9156                        | PCR         | GGT GAGTCCCTGACAAGCAG     | CCGATTTCTGTAGGATATTGTG   | 55                  |
| CG12681                       | PCR         | TTTCTCATCGATTGGGAG        | ATTCGGGTCATTTATTGT       | 48                  |
|                               | Alt PCR     | AAGCCAAAACATCAGCACCG      | ATGCAAGTTGAATTCGGGTC     | 48                  |
|                               | Int         | TATCGCAGCAACCGAAGGAC      | TCATGGCGAAGCATCAGG       |                     |
| CG12395                       | PCR         | CAAGACTGTGTCTATATCG       | ACAACAATAAAGCCGAGACC     | 52                  |
| CG2577                        | PCR         | TCTGGCTTTGATTTGTTTCCTG    | GAGTAATTCTAGTTACAGGC     | 54                  |
| CG1950                        | PCR         | CCCAATGCGACAAACTGT        | GATTAATGCGAAAGAACGAT     | 54                  |
|                               | Alt PCR     | TCCTAGTTCATCAAAGTGG       | TACGGTTCATGACAAGTGTC     | 52                  |
| CG1503                        | PCR         | CTGATTTTCTTATGCGTCAAC     | TGGTAAACAATTCCAAACCC     | 55                  |
| CG6789                        | PCR         | AAACTATGTAGCTGGCTGTG      | GCAGTTATTGCATTTTGTACGC   | 55                  |
|                               | Alt PCR     | TAGCTGGCTGTGAAATTTGT      | GCAGTTATTGCATTTTGTACGC   | 53                  |
| CG11697                       | PCR         | TCGAGAACC GAATACACAGC     | CTGAACTTTGACAACCTCCG     | 55                  |
| CG5662                        | PCR         | TAATATAGCCATCACTGCC       | TTTTGATTGCCTTCCCGACC     | 54                  |
| CG6999                        | PCR         | ACGTCAACTGACATCGCCTG      | TTGACACAAACCAGCACTCG     | 54                  |
|                               | Int         |                           | ACTTGCCATCGGTTATAGGC     |                     |
| CG5334                        | PCR         | AGTCGTCATTGTATTCTATAC     | CGAGTCACTGAGAAATGG       | 54                  |
| CG18341                       | PCR         | GTTATCTTTGATTTTACTGTCTAGC | GCCATGTGGCTATTTAACGG     | 53                  |
| CG10920                       | PCR         | ACGGCATTGCGTTTCGAT        | TCACGATCCAAAATGTACGCT    | 53                  |
| CG7860                        | PCR         | CAATCCGAGCACCAGACATC      | AATTTGTTTACTATTCTACTGGG  | 53                  |
| <b>FEMALE-BIASED GENES</b>    |             |                           |                          |                     |
| CG14434                       | PCR         | TCGAAAGCATCTTGTGGCGC      | CAAATGTTGGTAATTCTATGATAC | 53                  |
| CG15717                       | PCR         | CGCTGATAACGCAGCTGATC      | CTGGATGTAATTCCTTCCGG     | 53                  |
| CG9125                        | PCR         | ATAAATATTAGCGTTATTTCCGG   | ATTATAAAATCAGACTTGCTGTTG | 53                  |
| CG3024                        | PCR         | TGCTGCCTATCGCTTTTGCC      | GTTTTTAAATACAAACCGAAACC  | 53                  |
| CG8326                        | PCR         | CCCATGCTGTCGATACCACG      | GGGTAGCAAACGCATTACG      | 53                  |
| CG3704                        | PCR         | GTAATGGCCGACATGTTCCAC     | CTCCATATGTATATGTTATCAC   | 53                  |
| CG12117                       | PCR         | GTAGCAAAAACACTTGCGCAC     | AAAGACGCCAACTGTTGCC      | 53                  |
| CG3004                        | PCR         | GAAAATCCGCCACCAGGAGC      | TATCGATAAGCGCGATAGGC     | 54                  |
| CG4593                        | PCR         | AGGTGGACCTGAATCAAGCC      | TAAGAAAGGTCGAGGATGGC     | 58                  |
|                               | Int         | ACCTGGAGGTGGTGTACACC      |                          |                     |
| CG8675                        | PCR         | GAATCGGTTCTCCAGGTCC       | GTCTGTGATCGAAATAGTCC     | 53                  |
|                               | PCR-sim     | GTTAAGCAGGTAAATTGAG       | TTAACAAGCTTCGTTTAGCC     | 54                  |
| CG2222                        | PCR         | TTTTGAGAGGTCAGGCTGCC      | AAACAGCTGTTTCTGCCTCG     | 60                  |
| CG9915                        | PCR         | CAATGCCTCAAATGGACCCG      | TGCCATGTCTTACAGATACGC    | 53                  |
|                               | PCR2        | AAGTACATCACAGCCTTGCC      | GCTCCATTAGCGGTGGTTCG     | 53                  |
| CG1749                        | PCR         | AACCAACTGTACCAGCTG        | TTGCGTTCATTGCACGCTGC     | 53                  |
|                               | Int         | AAGCGTCACCGCCGACATGC      |                          |                     |
|                               | PCR2        | ACAATATCGCAGGGCGGACG      | GGACTAGTTGACCGTGCTGC     | 53                  |
| <b>UNBIASED GENES</b>         |             |                           |                          |                     |
| CG14629                       | PCR         | GACCCCTCCGTCGCCCCAGCGG    | CTCCGTTCCCGACTTTGCAAAG   | 53                  |
| CG1751                        | PCR         | CTTCTCTTGAAATCAAGGGC      | GACAAACAGTCGGCTTACCAC    | 54                  |
| CG15247                       | PCR         | AACAACGGACAACCAACAGG      | CGTCTTACATCACATGGAGG     | 53                  |
| CG9919                        | PCR         | CGGGTATGCTCCAATTGATTC     | TCTCAATCCCAATGGCCTCC     | 53                  |
| CG2555                        | PCR         | GAATTCGCCACCATAATCCATC    | CAGTGTTAATAGCAGATTACTGG  | 53                  |
| CG1397                        | PCR         | CATTATTGACTAGTTAGTAGGC    | AAGTGTGCTGAGTATTGGAAG    | 53                  |
| CG9571                        | PCR         | AACATTGCCGCTTCTACGC       | ATCCTCGAGTTCAGCCTCTTCC   | 53                  |
|                               | Int         | CGTTCTACGCCAAGAAGG        | TGGCACTCGATCCGTATGC      |                     |
| CG14797                       | PCR         | TCTGGTCCAATATACCCTCCG     | ATGACAGAGGATCAGTACGC     | 52                  |
|                               | Int         | AAGAACGATAGTCTCCAGC       |                          |                     |
| CG3603                        | PCR         | ATATAGTTGTCGCACGACCG      | CTAATATGGAACAACCAGGC     | 56                  |
|                               | Int         | TGTCGCACGACCGTTGAGG       | TGAGAGGTTACAATGGTGC      |                     |
| CG14772                       | PCR         | AAACTGAAGCGCCAGTGTCG      | TCTGAAACAGGCCGACTGGC     | 53                  |
| CG11126                       | PCR         | GCTGGGGAATATGTTGGAG       | CGGTGGAGTTCATGTAGTCC     | 53                  |
| CG15313                       | PCR         | AGTCGAGCATTACACGAGC       | TCATATAACAACGGGGTGC      | 50                  |
| CG9723                        | PCR         | CATCAAGCATAAGCAAGT        | GAACGAGATCAGTCCGGTGA     | 53                  |
|                               | Int         | CTAATTGGCGGCTGGACC        | AGCCTAATCAGTGGTTC        |                     |
| CG9164                        | PCR         | TCATTAATGCGAACATGTTC      | GGTGGTACGAATTCGATATC     | 53                  |
|                               | Int         | GGTAACACGTGGCTAAGGTA      | TTCTCCGGATCGCGGACGAG     |                     |
| CG15336                       | PCR         | ATCGAACGCCGTAATCTCGG      | ACCAGCACTGATTTACACAGC    | 60                  |
